# Supplementary material for: Systematic modulation and enhancement of CO2 : N2 selectivity and water stability in an isoreticular series of bio-MOF-11 analogues
Source: Royal Society of Chemistry journal article supplement (doi:10.1039/c3sc22207a), 2013-01-01
Supplement: c3sc22207a.pdf [file c3sc22207a.pdf]

## **Video short description**

**Bio-MOF-11 Connolly Surface Video:** Connolly Surface diagram of **bio-MOF-11**

**Bio-MOF-12 Connolly Surface Video:** Connolly Surface diagram of **bio-MOF-12**

**Bio-MOF-13 Configuration I Connolly Surface Video:** Connolly Surface Diagram of **bio-MOF-13** at configuration I

**Bio-MOF-13 Configuration II Connolly Surface Video:** Connolly Surface Diagram of **bio-MOF-13** at configuration II

**Bio-MOF-14 Configuration I Connolly Surface Video:** Connolly Surface Diagram of **bio-MOF-14** at configuration I

**Bio-MOF-14 Configuration II Connolly Surface Video:** Connolly Surface Diagram of **bio-MOF-14** at configuration II

**Bio-MOF-14 Configuration III Connolly Surface Video:** Connolly Surface Diagram of **bio-MOF-14** at configuration III
